# Supplementary material
Source: PubMed Central journal article supplement (PMC6352975)
Supplement: NIHMS998911-supplement-Supplemental_Tables_S1-S6.pdf [file NIHMS998911-supplement-Supplemental_Tables_S1-S6.pdf]

## SUPPLEMENTARY TABLES

**Table S1: MCC cell lines**

| Type of cell lines | Name                   | Growth pattern           | MCPyV status           | Culture medium                                                                | Reference |
|--------------------|------------------------|--------------------------|------------------------|-------------------------------------------------------------------------------|-----------|
| Variant            | MCC-13                 | Adherent                 | neg                    | RPMI 1640, 10% FBS                                                            | (1)       |
|                    | MCC-26                 | Adherent                 | neg                    |                                                                               | (2)       |
|                    | UI50                   | Adherent                 | neg                    |                                                                               | (3)       |
| Classical          | AlDo                   | Suspension, aggregates   | pos                    | RPMI 1640, 10% FBS                                                            | (4)       |
|                    | BroLi                  | Suspension, aggregates   | pos                    |                                                                               | (5)       |
|                    | LoKe                   | Suspension, aggregates   | pos                    |                                                                               | (5)       |
|                    | MKL-1                  | Suspension, aggregates   | pos                    |                                                                               | (6)       |
|                    | MKL-2                  | Suspension, aggregates   | pos                    |                                                                               | (2)       |
|                    | MS-1                   | Suspension, aggregates   | pos                    |                                                                               | (7)       |
|                    | PeTa                   | Suspension, aggregates   | pos                    |                                                                               | (4)       |
|                    | UM-MCC9                | Suspension, aggregates   | neg                    | Modified neural crest stem cell self-renewal medium, 15% chick embryo extract | (8,9)     |
|                    | UM-MCC13               | Suspension, aggregates   | pos                    |                                                                               |           |
|                    | UM-MCC29               | Suspension, aggregates   | pos                    |                                                                               |           |
|                    | UM-MCC31               | Suspension, aggregates   | pos                    |                                                                               |           |
|                    | UM-MCC32               | Suspension, aggregates   | pos                    |                                                                               |           |
|                    | UM-MCC34               | Suspension, aggregates   | neg                    |                                                                               |           |
|                    | UM-MCC39               | Suspension, aggregates   | neg                    |                                                                               |           |
|                    | UM-MCC52               | Suspension, aggregates   | pos                    |                                                                               |           |
|                    | UM-MCC565              | Suspension, aggregates   | pos                    |                                                                               |           |
|                    | UM-MCC623              | Suspension, aggregates   | neg                    |                                                                               |           |
|                    | UM-MCC624              | Suspension, aggregates   | neg                    |                                                                               |           |
|                    | WaGa                   | Suspension, single cells | pos                    | RPMI 1640, 10% FBS                                                            | (5)       |
|                    | WoWe                   | Suspension, aggregates   | pos                    |                                                                               | (4)       |
| UKE-MCC1a          | Suspension, aggregates | pos                      | Established in our lab |                                                                               |           |

In all the tables: pos = positive; neg = negative; unk = unknown

**Table S2 : Non-MCC cell lines**

| Type of cell lines      | Name                     | Growth pattern | Culture medium     | Reference |      |
|-------------------------|--------------------------|----------------|--------------------|-----------|------|
| Melanoma                | BLM                      | Adherent       | RPMI 1640, 10% FBS | (10)      |      |
|                         | MV3                      | Adherent       |                    | (11)      |      |
|                         | Ma-Mel-02                | Adherent       |                    |           |      |
|                         | Ma-Mel-12                | Adherent       |                    |           |      |
|                         | Ma-Mel-13                | Adherent       |                    |           |      |
|                         | Ma-Mel-47                | Adherent       |                    |           |      |
|                         | Ma-Mel-61a               | Adherent       |                    |           |      |
|                         | Ma-Mel-61f               | Adherent       |                    |           |      |
|                         | Ma-Mel-66a               | Adherent       |                    |           |      |
|                         | Ma-Mel-68                | Adherent       |                    |           |      |
|                         | Ma-Mel-86a               | Adherent       |                    |           | (12) |
|                         | Ma-Mel-86c               | Adherent       |                    |           | (13) |
|                         | SK-Mel-28                | Adherent       |                    |           |      |
|                         | WM-9                     | Adherent       |                    |           |      |
| Squamous cell carcinoma | HSC-1                    | Adherent       | RPMI 1640, 10% FBS | (14)      |      |
|                         | MET-1                    | Adherent       |                    | (15)      |      |
|                         | MET-4                    | Adherent       |                    |           |      |
|                         | SCL-1                    | Adherent       |                    |           |      |
|                         | SCL-2                    | Adherent       |                    |           |      |
| Fibroblasts             | MRC-5                    | Adherent       | MEM Eagle, 10% FBS | (16)      |      |
|                         | Primary skin fibroblasts | Adherent       | DMEM, 15% FBS      | (17)      |      |
| Epithelial cells        | 293T                     | Adherent       | DMEM, 10% FBS      | (18)      |      |
| Lung carcinoma          | A549                     | Adherent       | RPMI 1640, 10% FBS | (19)      |      |

## SUPPLEMENTARY REFERENCE

1. Leonard JH, Dash P, Holland P, Kearsley JH, Bell JR. Characterisation of four Merkel cell carcinoma adherent cell lines. *Int J Cancer* 1995;60:100-7
2. Van Gele M, Leonard JH, Van Roy N, Van Limbergen H, Van Belle S, Cocquyt V, *et al.* Combined karyotyping, CGH and M-FISH analysis allows detailed characterization of unidentified chromosomal rearrangements in Merkel cell carcinoma. *Int J Cancer* 2002;101:137-45
3. Ronan SG, Green AD, Shilkaitis A, Huang TS, Das Gupta TK. Merkel cell carcinoma: in vitro and in vivo characteristics of a new cell line. *J Am Acad Dermatol* 1993;29:715-22
4. Houben R, Dreher C, Angermeyer S, Borst A, Utikal J, Haferkamp S, *et al.* Mechanisms of p53 restriction in Merkel cell carcinoma cells are independent of the Merkel cell polyoma virus T antigens. *J Invest Dermatol* 2013;133:2453-60
5. Houben R, Shuda M, Weinkam R, Schrama D, Feng H, Chang Y, *et al.* Merkel cell polyomavirus-infected Merkel cell carcinoma cells require expression of viral T antigens. *J Virol* 2010;84:7064-72
6. Rosen ST, Gould VE, Salwen HR, Herst CV, Le Beau MM, Lee I, *et al.* Establishment and characterization of a neuroendocrine skin carcinoma cell line. *Lab Invest* 1987;56:302-12
7. Guastafierro A, Feng H, Thant M, Kirkwood JM, Chang Y, Moore PS, *et al.* Characterization of an early passage Merkel cell polyomavirus-positive Merkel cell carcinoma cell line, MS-1, and its growth in NOD scid gamma mice. *J Virol Methods* 2013;187:6-14
8. Harms PW, Patel RM, Verhaegen ME, Giordano TJ, Nash KT, Johnson CN, *et al.*

- Distinct gene expression profiles of viral- and nonviral-associated merkel cell carcinoma revealed by transcriptome analysis. *J Invest Dermatol* 2013;133:936-45
9. Verhaegen ME, Mangelberger D, Weick JW, Vozheiko TD, Harms PW, Nash KT, *et al.* Merkel cell carcinoma dependence on bcl-2 family members for survival. *J Invest Dermatol* 2014;134:2241-50
  10. Quax PH, van Muijen GN, Weening-Verhoeff EJ, Lund LR, Dano K, Ruiter DJ, *et al.* Metastatic behavior of human melanoma cell lines in nude mice correlates with urokinase-type plasminogen activator, its type-1 inhibitor, and urokinase-mediated matrix degradation. *J Cell Biol* 1991;115:191-9
  11. Ugurel S, Thirumaran RK, Bloethner S, Gast A, Sucker A, Mueller-Berghaus J, *et al.* B-RAF and N-RAS mutations are preserved during short time in vitro propagation and differentially impact prognosis. *PLoS One* 2007;2:e236
  12. Zhao F, Sucker A, Horn S, Heeke C, Bielefeld N, Schrors B, *et al.* Melanoma lesions independently acquire T-cell resistance during metastatic latency. *Cancer Res* 2016; 76: 4347-58
  13. Fenouille N, Tichet M, Dufies M, Pottier A, Mogha A, Soo JK, *et al.* The epithelial-mesenchymal transition (EMT) regulatory factor SLUG (SNAI2) is a downstream target of SPARC and AKT in promoting melanoma cell invasion. *PLoS One* 2012;7:e40378
  14. Cheung BB, Koach J, Tan O, Kim P, Bell JL, D'Andreti C, *et al.* The retinoid signalling molecule, TRIM16, is repressed during squamous cell carcinoma skin carcinogenesis in vivo and reduces skin cancer cell migration in vitro. *J Pathol* 2012;226:451-62
  15. Reichrath J, Rafi L, Rech M, Mitschele T, Meineke V, Gartner BC, *et al.* Analysis of the vitamin D system in cutaneous squamous cell carcinomas. *J Cutan Pathol*

2004;31:224-31

16. Friedman HM, Koropchak C. Comparison of WI-38, MRC-5, and IMR-90 cell strains for isolation of viruses from clinical specimens. *J Clin Microbiol* 1978;7:368-71
17. Pfeiffer LM, Kopelovich L. Differential genetic susceptibility of cultured human skin fibroblasts to transformation by Kirsten murine sarcoma virus. *Cell* 1977;10:313-20
18. He TC, Zhou S, da Costa LT, Yu J, Kinzler KW, Vogelstein B. A simplified system for generating recombinant adenoviruses. *Proc Natl Acad Sci U S A* 1998;95:2509-14
19. Nishikawa E, Osada H, Okazaki Y, Arima C, Tomida S, Tatematsu Y, *et al.* miR-375 is activated by ASH1 and inhibits YAP1 in a lineage-dependent manner in lung cancer. *Cancer Res* 2011;71:6165-73

**Table S3 : Clinical data of MCC patients from Graz**

| Pat-ID | Sex | Age at ED | Stage at ED | MCPyV status | Sample |       |                      | Therapy               | Pt localization |
|--------|-----|-----------|-------------|--------------|--------|-------|----------------------|-----------------------|-----------------|
|        |     |           |             |              | NED    | Tumor | Unknown/ other tumor |                       |                 |
| t #1   | f   | 76        | 3           | pos          | 1      | 1     | 0                    | Surgery, RT           | upper leg       |
| t #2   | m   | 62        | 3           | neg          | 2      | 2     | 0                    | Surgery, RT           | trunk front     |
| t #3   | m   | 70        | 3           | unk          | 1      | 2     | 0                    | Surgery, RT           | head            |
| t #4   | m   | 69        | 1           | unk          | 1      | 0     | 0                    | Surgery               | lower arm       |
| t #5   | f   | 44        | 2           | unk          | 0      | 1     | 0                    | Surgery, RT           | head            |
| t #6   | m   | 75        | 2           | pos          | 2      | 2     | 0                    | Surgery, RT           | upper arm       |
| t #7   | m   | 69        | 3           | pos          | 1      | 0     | 0                    | Surgery, RT           | LN axilla       |
| t #8   | m   | 82        | 1           | neg          | 1      | 1     | 0                    | Surgery               | head            |
| t #9   | m   | 88        | 4           | pos          | 0      | 1     | 0                    | Surgery, RT           | head            |
| t #10  | m   | 82        | 3           | unk          | 1      | 0     | 0                    | Surgery, RT           | LN cervical     |
| t #11  | f   | 70        | 3           | unk          | 0      | 1     | 0                    | Surgery, RT           | lower arm       |
| t #12  | f   | 73        | 2           | neg          | 1      | 1     | 0                    | Surgery, RT           | upper arm       |
| t #13  | f   | 77        | 1           | pos          | 1      | 0     | 0                    | Surgery               | head            |
| t #14  | f   | 68        | 1           | unk          | 0      | 1     | 0                    | Surgery, RT           | upper leg       |
| t #15  | f   | 91        | 3           | unk          | 1      | 0     | 0                    | Surgery               | head            |
| t #16  | m   | 59        | 4           | unk          | 0      | 1     | 0                    | Surgery, RT           | trunk           |
| t #17  | m   | 84        | 2           | unk          | 1      | 0     | 0                    | Surgery, RT,<br>Chemo | head            |
| t #18  | m   | 81        | 3           | unk          | 0      | 1     | 0                    | Unknown               |                 |
| t #19  | m   | 82        | 4           | unk          | 0      | 1     | 0                    | Surgery               | head            |
| t #20  | f   | 75        | 1           | pos          | 0      | 1     | 0                    | Surgery, RT           | upper leg       |
| t #21  | m   | 69        | 4           | unk          | 0      | 1     | 0                    | Surgery, RT,<br>Chemo | trunk           |
| t #22  | f   | 77        | 1           | unk          | 1      | 0     | 0                    | Surgery               | lower leg       |
| t #23  | m   | 72        | 1           | unk          | 0      | 1     | 0                    | Surgery, RT           | lower arm       |
| t #24  | m   | 81        | 4           | unk          | 0      | 1     | 0                    | Surgery,<br>Chemo     | head            |
| t #25  | f   | 81        | 1           | pos          | 0      | 0     | 1                    | Surgery               | head            |
| t #26  | m   | 59        | 3           | unk          | 0      | 1     | 0                    | Surgery, RT           | trunk           |
| t #27  | m   | 62        | 1           | unk          | 1      | 0     | 0                    | Surgery, RT           | upper leg       |
| t #28  | m   | 71        | 3           | unk          | 0      | 1     | 0                    | Surgery, RT           | lower arm       |
| t #29  | f   | 69        | 4           | unk          | 0      | 1     | 0                    | Surgery, RT,<br>Chemo | upper arm       |

**Table S4 : Clinical data of MCC patients from Seattle**

| Pat-ID | Sex | Age at ED | Stage at ED | MCPyV status | Sample |       |                         | Therapy       | Pt localization |
|--------|-----|-----------|-------------|--------------|--------|-------|-------------------------|---------------|-----------------|
|        |     |           |             |              | NED    | Tumor | Unknown/<br>other tumor |               |                 |
| c #1   | m   | 57        | 1           | pos          | 8      | 0     | 0                       | none          | upper limb      |
| c #2   | m   | 77        | 1           | pos          | 7      | 1     | 0                       | RT            | upper limb      |
| c #3   | f   | 71        | 1           | pos          | 5      | 1     | 0                       | RT            | head & neck     |
| c #4   | f   | 71        | 1           | pos          | 7      | 0     | 0                       | RT            | head & neck     |
| c #5   | m   | 62        | 2           | pos          | 8      | 0     | 0                       | RT            | trunk           |
| c #6   | f   | 74        | 3           | pos          | 8      | 1     | 4                       | RT            | unknown         |
| c #7   | m   | 67        | 1           | pos          | 1      | 10    | 2                       | RT; IT        | buttock         |
| c #8   | m   | 55        | 3           | pos          | 1      | 3     | 0                       | RT            | unknown         |
| c #9   | m   | 65        | 3           | pos          | 0      | 2     | 1                       | RT            | buttock         |
| c #10  | m   | 69        | 3           | pos          | 1      | 1     | 0                       | RT            | unknown         |
| c #11  | m   | 56        | 3           | pos          | 0      | 5     | 0                       | RT; IT        | unknown         |
| c #12  | f   | 55        | 3           | pos          | 0      | 6     | 6                       | RT; IT        | unknown         |
| c #13  | m   | 64        | 2           | pos          | 0      | 6     | 5                       | RT            | lower limb      |
| c #14  | f   | 66        | unk         | pos          | 3      | 2     | 0                       | RT            | lower limb      |
| c #15  | m   | 63        | 3           | pos          | 9      | 1     | 0                       | unknown       | trunk           |
| c #16  | m   | 74        | 3           | pos          | 0      | 7     | 0                       | RT; IT        | upper limb      |
| c #17  | m   | 52        | 3           | pos          | 3      | 14    | 1                       | Chemo; RT; IT | lower limb      |
| c #18  | m   | 58        | 3           | pos          | 0      | 5     | 0                       | RT            | head & neck     |
| c #19  | f   | 66        | 2           | neg          | 0      | 1     | 0                       |               | lower limb      |
| c #20  | m   | 65        | 1           | pos          | 1      | 0     | 0                       | RT            | upper limb      |
| c #21  | f   | 70        | 3           | neg          | 1      | 0     | 0                       | RT            | unknown         |
| c #22  | m   | 68        | 1           | pos          | 1      | 0     | 0                       | RT            | upper limb      |
| c #23  | f   | 77        | 2           | neg          | 0      | 1     | 0                       | RT            | head & neck     |
| c #24  | m   | 86        | 3           | pos          | 2      | 0     | 0                       | RT            | trunk           |
| c #25  | m   | 24        | 3           | neg          | 0      | 2     | 0                       | RT; Chemo     | head & neck     |
| c #26  | f   | 73        | 3           | unk          | 0      | 4     | 0                       | RT; Chemo     | upper limb      |
| c #27  | f   | 52        | 3           | pos          | 2      | 1     | 1                       | RT            | unknown         |
| c #28  | f   | 82        | 3           | pos          | 0      | 1     | 1                       | RT; IT        | unknown         |
| c #29  | m   | 82        | 3           | neg          | 0      | 4     | 0                       | RT, Chemo; IT | upper limb      |
| c #30  | m   | 66        | 3           | pos          | 4      | 4     | 1                       | RT            | head & neck     |
| c #31  | m   | 50        | 2           | pos          | 5      | 4     | 2                       | RT; IT        | lower limb      |
| c #32  | m   | 68        | 1           | pos          | 1      | 1     | 2                       | RT            | upper limb      |
| c #33  | f   | 68        | 1           | pos          | 1      | 3     | 1                       | RT            | lower limb      |

**Table S5 : Clinical data of MCC patients from Essen**

| Pat-ID | Gender | Age at ED | Stage at ED | MCPyV status | Samples |       |                      | Therapy   | Pt localization |
|--------|--------|-----------|-------------|--------------|---------|-------|----------------------|-----------|-----------------|
|        |        |           |             |              | NED     | Tumor | Unknown/ other tumor |           |                 |
| e #1   | m      | 75        | 4           | pos          | 0       | 1     | 0                    | IT        | cheek           |
| e #2   | m      | 71        | 3           | pos          | 0       | 3     | 0                    | IT        | lower leg       |
| e #3   | m      | 64        | 4           | pos          | 3       | 1     | 0                    | IT        | lower arm       |
| e #4   | m      | 70        | 4           | pos          | 3       | 1     | 0                    | IT        | lower arm       |
| e #5   | f      | 66        | 4           | pos          | 0       | 1     | 0                    | IT        | cheek           |
| e #6   | f      | 78        | 4           | pos          | 0       | 2     | 0                    | IT        | forehead        |
| e #7   | m      | 80        | 4           | unk          | 3       | 1     | 0                    | IT        | upper leg       |
| e #8   | m      | 60        | 4           | pos          | 3       | 1     | 0                    | IT        | lower leg       |
| e #9   | f      | 57        | 4           | pos          | 2       | 2     | 0                    | IT        | unknown primary |
| e #10  | m      | 75        | 4           | pos          | 6       | 8     | 0                    | Chemo; IT | upper arm       |
| e #11  | f      | 70        | 4           | pos          | 4       | 1     | 0                    | IT        | nose            |
| e #12  | f      | 42        | 4           | pos          | 0       | 2     | 0                    | IT        | unknown primary |
| e #13  | f      | 61        | 4           | unk          | 0       | 2     | 0                    | IT        | buttock         |
| e #14  | f      | 61        | 4           | pos          | 0       | 2     | 0                    |           | lower leg       |
| e #15  | m      | 54        | 3           | pos          | 5       | 0     | 0                    | IT        | lower arm       |
| e #16  | m      | 68        | 2           | pos          | 4       | 0     | 0                    | none      | buttock         |
| e #17  | m      | 73        | 2           | pos          | 4       | 0     | 0                    | none      | upper arm       |
| e #18  | m      | 59        | 2           | pos          | 4       | 0     | 0                    | IT        | unknown primary |
| e #19  | f      | 73        | 2           | unk          | 2       | 0     | 0                    | none      | knee            |
| e #20  | f      | 80        | 3           | pos          | 3       | 0     | 0                    | IT        | lower leg       |
| e #21  | f      | 50        | 2           | pos          | 2       | 0     | 0                    | IT        | lower leg       |

**Table S6 : Clinical data of MCC patients from Melbourne**

| Pat-ID | Gender | Age at ED | Stage at ED | MCPyV status | Samples |       |                      | Therapy         | Pt localization |
|--------|--------|-----------|-------------|--------------|---------|-------|----------------------|-----------------|-----------------|
|        |        |           |             |              | NED     | Tumor | Unknown/ other tumor |                 |                 |
| p #1   | m      | 72        | 4           | pos          | 8       | 3     | 0                    | RT; surgery; IT | head and neck   |
| p #2   | m      | 86        | 4           | neg          | 0       | 1     | 0                    | unknown         | head and neck   |
| p #3   | f      | 79        | 3           | neg          | 2       | 3     | 0                    | RT              | lower limb      |
| p #4   | m      | 83        | 3           | pos          | 0       | 2     | 0                    | RT              | upper limb      |
| p #5   | m      | 75        | 4           | neg          | 1       | 1     | 0                    | Surgery         | unknown         |
| p #6   | m      | 71        | 4           | pos          | 0       | 3     | 0                    | Chemo; RT       | unknown         |
| p #7   | m      | 77        | 4           | pos          | 0       | 1     | 0                    | RT              | unknown         |
| p #8   | m      | 56        | 3           | unk          | 0       | 0     | 5                    | Chemo; RT       | head and neck   |
| p #9   | m      | 72        | 4           | pos          | 0       | 1     | 0                    | RT; chemo       | trunk           |
| p #10  | m      | 72        | 4           | neg          | 7       | 1     | 0                    | IT              | head and neck   |
| p #11  | m      | 85        | 3           | neg          | 2       | 4     | 0                    | RT              | head and neck   |
| p #12  | m      | 64        | 3           | neg          | 4       | 1     | 0                    | RT; Chemo       | unknown         |
| p #13  | m      | 70        | 3           | pos          | 0       | 3     | 0                    | RT; Chemo; IT   | lower limb      |
| p #14  | m      | 72        | 3           | neg          | 4       | 1     | 0                    | IT              | head and neck   |
| p #15  | f      | 84        | 4           | pos          | 0       | 1     | 0                    | Surgery; RT     | head and neck   |
| p #16  | m      | 72        | 3           | neg          | 3       | 3     | 0                    | RT; Chemo, IT   | unknown         |
| p #17  | m      | 72        | 3           | pos          | 1       | 1     | 0                    | RT; Chemo       | unknown         |
| p #18  | f      | 92        | 3           | pos          | 0       | 4     | 0                    | RT              | lower limb      |
| p #19  | f      | 61        | 3           | unk          | 3       | 1     | 0                    | RT; Chemo       | upper limb      |
| p #20  | m      | 92        | 4           | neg          | 0       | 0     | 2                    | unknown         | upper limb      |
| p #21  | f      | 65        | 4           | pos          | 0       | 1     | 0                    | RT              | unknown         |
| p #22  | m      | 79        | 4           | pos          | 0       | 4     | 0                    | IT              | unknown         |
| p #23  | f      | 83        | 3           | pos          | 0       | 3     | 0                    | Surgery; RT     | unknown         |
| p #24  | m      | 84        | 4           | unk          | 0       | 3     | 0                    | IT              | head and neck   |
| p #25  | m      | 65        | 4           | unk          | 0       | 2     | 0                    | RT; IT          | trunk           |
| p #26  | f      | 89        | 3           | neg          | 0       | 0     | 1                    | IT              | upper limb      |
